# Supplementary material
Source: MDPI journal article supplement (https://www.mdpi.com/1999-4907/14/8/1532)

## Supplementary Materials

### **Inconsistent Responses of Rhizosphere Microbial Community Structure and Extracellular Enzyme Activity to Short-Term Nitrogen and Phosphorus Additions in Chinese Fir (*Cunninghamia lanceolata*) Plantations**

**Zhilong Hu<sup>1,2</sup> Wenhua Xiang<sup>1,2,\*</sup>**

*<sup>1</sup> Faculty of Life Science and Technology, Central South University of Forestry and Technology, Changsha, Hunan, 410004, China*

*<sup>2</sup> Huitong National Station for Scientific Observation and Research of Chinese Fir Plantation Ecosystems in Hunan Province, Huitong, Hunan 438107, China*

\*Corresponding author:

Wenhua Xiang, E-mail: [xiangwh2005@163.com](mailto:xiangwh2005@163.com); Tel/Fax: +86-731-85623350

**Table S1.** The fatty acids detected in this study.

| Category     | Subgroup       | Fatty acid                                                                                                 |
|--------------|----------------|------------------------------------------------------------------------------------------------------------|
| Bacteria     | Gram-positive  | 15:0 anteiso, 15:0 iso, 16:0 iso, 17:0 anteiso, 17:0 iso, 17:1 iso w9c, 18:0 iso,                          |
|              | Gram-negative  | 15:1 w5c, 16:1 w7c, 17:0 cyclo w7c, 17:1 w8c, , 18:1 w5c, , 18:1 w7c, 19:0 cyclo w7c,                      |
|              | Other bacteria | 17:0,15:0                                                                                                  |
| Fungi        | Fungi          | 16:1 w5c, 18:1 w9c, 18:2 w6c, 18:2 w9c                                                                     |
|              | AM Fungi       | 16:1 w5c                                                                                                   |
| Actinomycete |                | 16:0 10-methyl, 17:0 10-methyl, 17:1 w7c 10-methyl, 18:0 10-methyl, 18:1 w7c 10-methyl, 19:1 w7c 10-methyl |
| Other PLFAs  |                | 14:0, 16:0, 18:0, 20:0                                                                                     |

Tian, D.; Jiang, L.; Ma, S.; Fang, W.J.; Schmid, B; Xu, L.C., et al. Effects of nitrogen deposition on soil microbial communities in temperate and subtropical forests in China. *Sci. Total Environ.* **2017**, 607, 1367-1375.

Shen, F.F.; Wu, J.P.; Fan, H.B.; Liu, W.F.; Guo, X.M.; Duan, H.L.; Hu, L.; Lei, X.M.; Wei, X.H. Soil N/P and C/P ratio regulate the responses of soil microbial community composition and enzyme activities in a long-term nitrogen loaded Chinese fir forest. *Plant Soil* **2019**, 436, 91-107.

**Table S2.** General site and soil characteristics (0–10 cm soil depth) in Chinese fir plantation sites at the Huitong National Forest Ecosystem Research Station used in the present study.

| Stand types                             | Chinese fir   |
|-----------------------------------------|---------------|
| Tree DBH (cm)                           | 8.26 (0.49)   |
| Tree height (m)                         | 6.42 (0.62)   |
| pH                                      | 4.28 (0.03)   |
| SWC (%)                                 | 32.83 (0.54)  |
| SOC (g/kg)                              | 25.15 (0.92)  |
| TP (g/kg)                               | 0.15 (0.00)   |
| DOC (mg/kg)                             | 391.2 (15.98) |
| NH <sub>4</sub> <sup>+</sup> -N (mg/kg) | 9.49 (3.13)   |
| NO <sub>3</sub> <sup>-</sup> -N (mg/kg) | 6.26 (1.26)   |
| DON (mg/kg)                             | 22.6 (1.26)   |
| AP (mg/kg)                              | 7.72 (0.52)   |

**Table S3.** Summary statistics (F statistic and probability level) of a one-way ANOVA on the effects of N addition and P addition on soil nutrients properties, soil enzymes and relative abundance PLFAs (mol %) in rhizosphere soil of Chinese fir plantations.

| Parameters                      | N addition |              | P addition |              |
|---------------------------------|------------|--------------|------------|--------------|
|                                 | F          | <i>p</i>     | F          | <i>p</i>     |
| SWC                             | 0.51       | 0.7          | 2.57       | <b>0.083</b> |
| pH                              | 5.19       | <b>0.007</b> | 5.28       | <b>0.008</b> |
| SOC                             | 3.01       | <b>0.052</b> | 1.36       | 0.2          |
| TN                              | 9.65       | <b>0.000</b> | 4.06       | <b>0.019</b> |
| Inorganic N                     | 2.54       | <b>0.082</b> | 6.62       | <b>0.002</b> |
| NH <sub>4</sub> <sup>+</sup> -N | 2.39       | <b>0.096</b> | 3.01       | <b>0.051</b> |
| NO <sub>3</sub> <sup>-</sup> -N | 1.09       | 0.39         | 3.73       | <b>0.026</b> |
| TP                              | 5.69       | <b>0.005</b> | 2.64       | <b>0.075</b> |
| AP                              | 2.39       | <b>0.096</b> | 3.57       | <b>0.030</b> |
| SOC:TN                          | 0.70       | 0.5          | 3.99       | <b>0.021</b> |
| SOC:TP                          | 2.17       | 0.1          | 8.73       | <b>0.000</b> |
| TN:TP                           | 2.33       | 0.1          | 1.61       | 0.2          |
| BG                              | 50.18      | <b>0.000</b> | 5.69       | <b>0.005</b> |
| NAG+LAP                         | 9.53       | <b>0.000</b> | 3.16       | <b>0.045</b> |
| ACP                             | 8.91       | <b>0.000</b> | 6.71       | <b>0.002</b> |
| CBH                             | 27.64      | <b>0.000</b> | 10.23      | <b>0.000</b> |
| BX                              | 9.95       | <b>0.000</b> | 5.71       | <b>0.005</b> |
| AG                              | 47.06      | <b>0.000</b> | 9.92       | <b>0.000</b> |
| BG:(NAG+LAP)                    | 2.59       | <b>0.078</b> | 3.40       | <b>0.035</b> |
| BG:ACP                          | 18.61      | <b>0.000</b> | 0.57       | 0.6          |
| (NAG+LAP):ACP                   | 6.74       | <b>0.002</b> | 0.35       | 0.8          |
| Vector length                   | 3.19       | <b>0.043</b> | 2.67       | <b>0.072</b> |
| Vector angle                    | 21.12      | <b>0.000</b> | 0.64       | 0.6          |
| Total PLFAs                     | 0.89       | 0.4          | 1.79       | 0.1          |
| Bacteria                        | 1.47       | 0.2          | 3.91       | <b>0.022</b> |
| Fungi                           | 4.57       | <b>0.012</b> | 4.18       | <b>0.018</b> |

|                |      |              |       |              |
|----------------|------|--------------|-------|--------------|
| Actinobacteria | 2.46 | <b>0.090</b> | 14.71 | <b>0.000</b> |
| AMF            | 3.81 | <b>0.024</b> | 0.81  | 0.5          |
| G+             | 2.75 | <b>0.067</b> | 3.58  | <b>0.030</b> |
| G-             | 2.73 | <b>0.068</b> | 1.56  | 0.2          |
| Other bacteria | 1.96 | 0.1          | 1.52  | 0.2          |
| F:B            | 4.30 | <b>0.016</b> | 4.51  | <b>0.013</b> |
| G+:G-          | 2.96 | <b>0.054</b> | 1.52  | 0.2          |

---

Significant differences between different nutrient addition are shown in bold ( $p < 0.1$ ).

**Figure S1.** Effects of N and P additions on rhizosphere soil properties and microbial community structure (indicated by relative abundance of individual PLFAs). Values are means  $\pm$  SE ( $n = 4$ ). Different lowercase letters indicate significant difference among the levels of N or P addition ( $p < 0.05$ ). CK, 0 kg N ha<sup>-1</sup> a<sup>-1</sup>+0 kg P ha<sup>-1</sup> a<sup>-1</sup>; N1, 25 kg N ha<sup>-1</sup> a<sup>-1</sup>; N2, 50 kg N ha<sup>-1</sup> a<sup>-1</sup>; N3, 100 kg N ha<sup>-1</sup> a<sup>-1</sup>; N4, 200 kg N ha<sup>-1</sup> a<sup>-1</sup>; P1, 25 kg P ha<sup>-1</sup> a<sup>-1</sup>; P2, 50 kg P ha<sup>-1</sup> a<sup>-1</sup>; P3, 75 kg P ha<sup>-1</sup> a<sup>-1</sup>; P4, 100 kg P ha<sup>-1</sup> a<sup>-1</sup>.

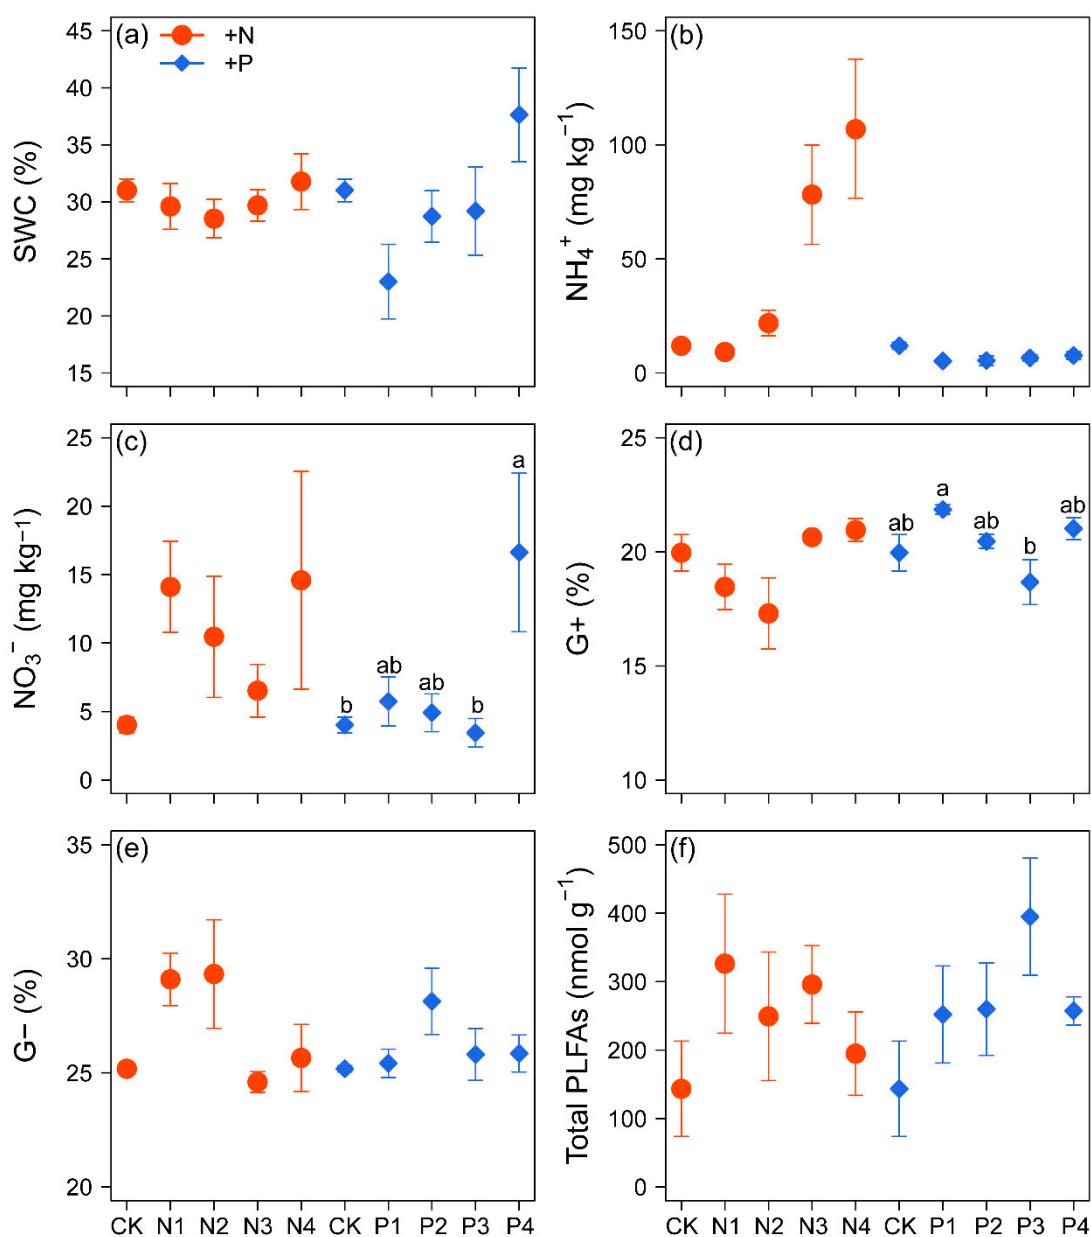

**Figure S2.** The correlation between soil properties and microbial groups, enzyme activities, stoichiometric ratio of enzymes, vector angle in the rhizosphere. Other B%, relative abundance of other bacteria. B%, relative abundance of bacteria. F%, relative abundance of fungi. AMF%, relative abundance of arbuscular mycorrhizal fungi. Act%, relative abundance of actinobacteria. G+%, relative abundance of Gram-positive bacteria. G-%, relative abundance of Gram-negative bacteria.\*  $p < 0.05$ ; \*\*  $p < 0.01$ ; \*\*\*  $p < 0.001$ .

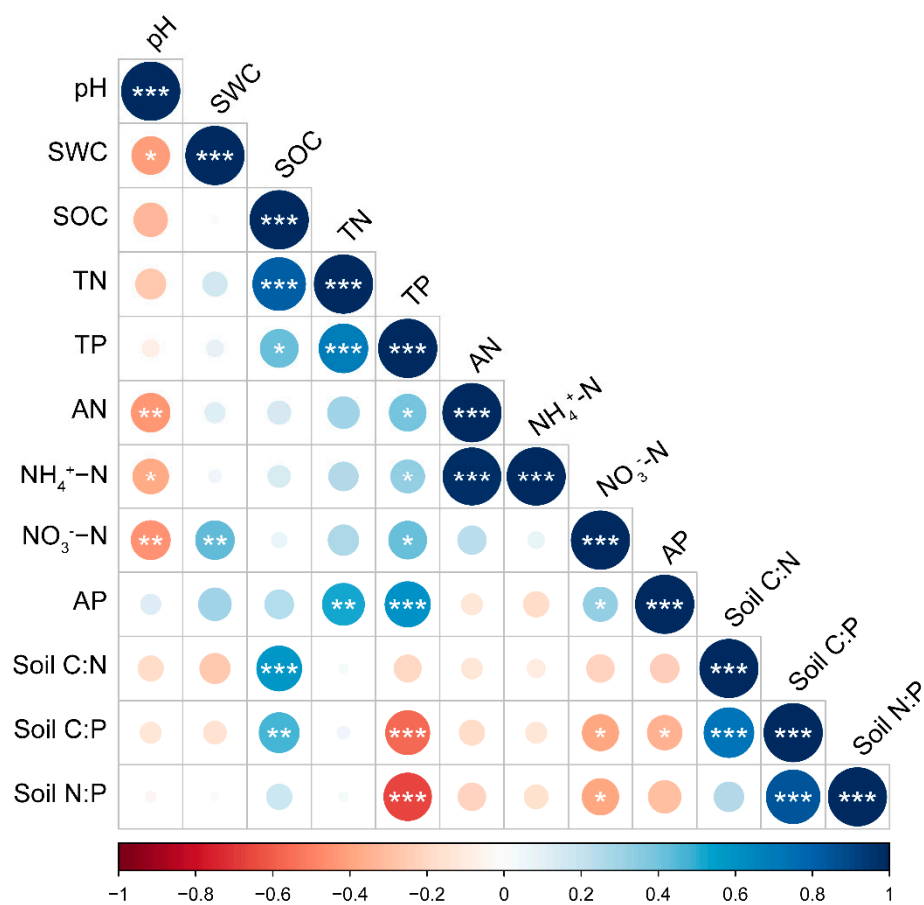





**Figure S4.** Principal component analysis (PCA) for rhizosphere microbial community structure (a), in which PC1 explains 52% and PC2 explains 23.8% of total variations. PCA for rhizosphere extracellular enzyme actives (b), in which PC1 explains 80.5% and PC2 explains 13% of total variations. PERMANOVA statistics refer to significant N and P treatment effects. CK, 0 kg N ha<sup>-1</sup> a<sup>-1</sup>+0 kg P ha<sup>-1</sup> a<sup>-1</sup>; N1, 25 kg N ha<sup>-1</sup> a<sup>-1</sup>; N2, 50 kg N ha<sup>-1</sup> a<sup>-1</sup>; N3, 100 kg N ha<sup>-1</sup> a<sup>-1</sup>; N4, 200 kg N ha<sup>-1</sup> a<sup>-1</sup>; P1, 25 kg P ha<sup>-1</sup> a<sup>-1</sup>; P2, 50 kg P ha<sup>-1</sup> a<sup>-1</sup>; P3, 75 kg P ha<sup>-1</sup> a<sup>-1</sup>; P4, 100 kg P ha<sup>-1</sup> a<sup>-1</sup>.

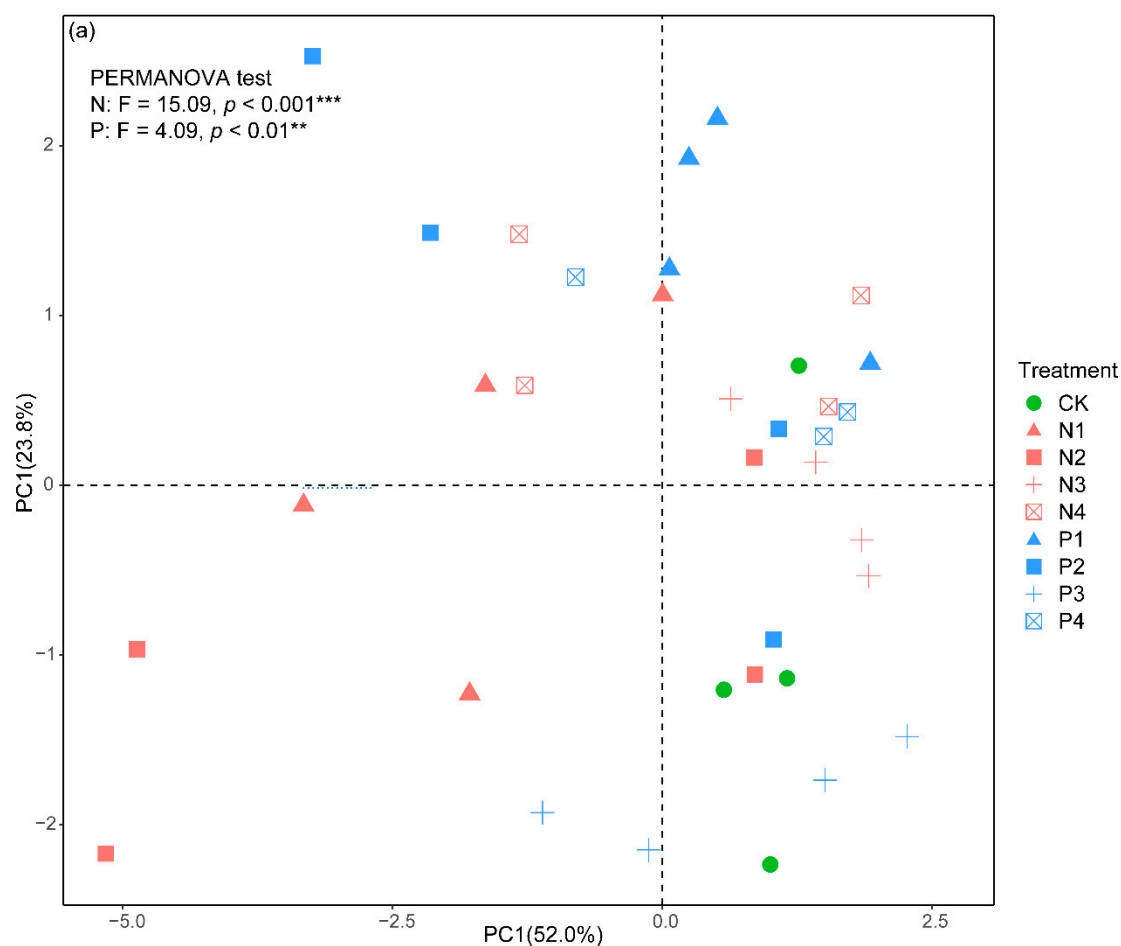

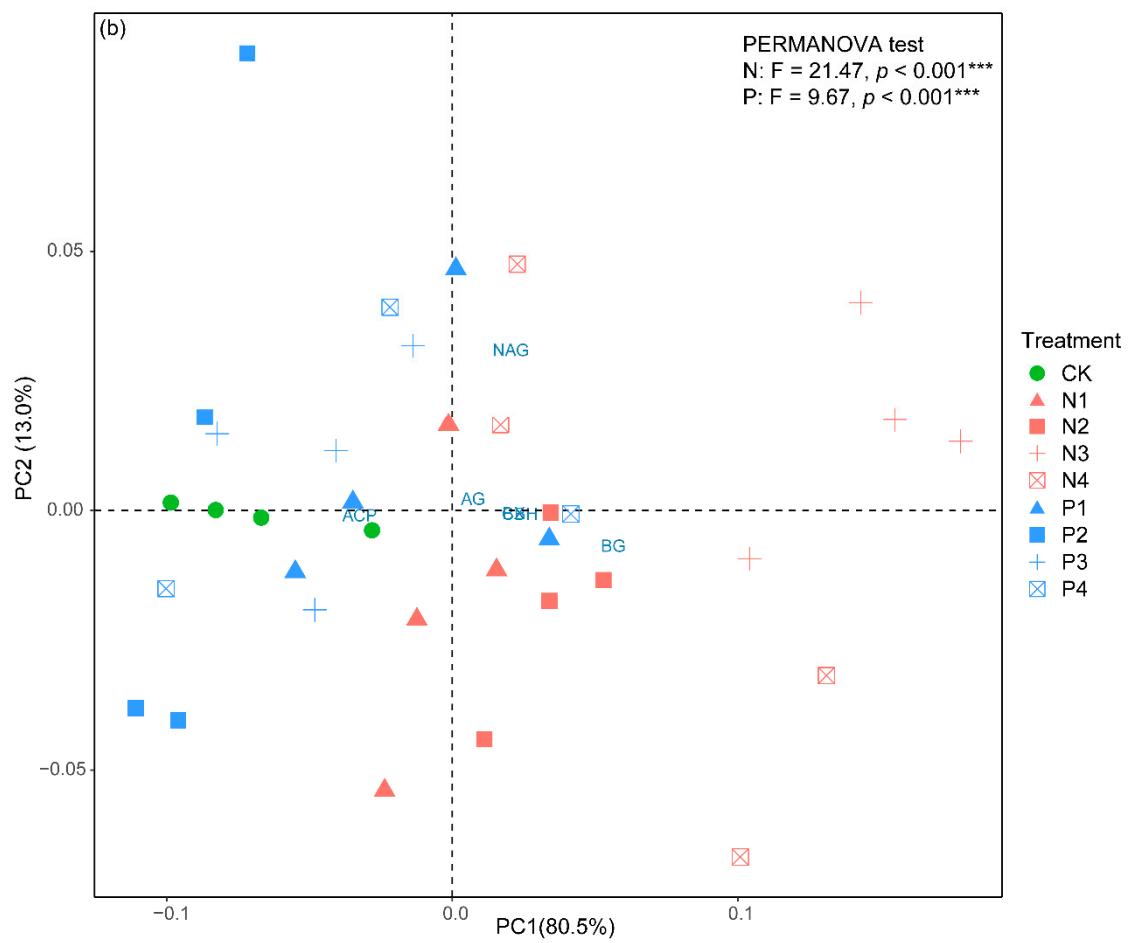

Supplement: s1 [file s1]
